# Supplementary material for: Gold nanoparticle-based enhanced ELISA for respiratory syncytial virus
Source: Royal Society of Chemistry journal article supplement (doi:10.1039/c4nj00253a), 2014-01-01
Supplement: c4nj00253a1.pdf [file c4nj00253a1.pdf]

## **Electronic Supplementary Material (ESI)**

*for*

## **Gold nanoparticles-based enhanced ELISA for respiratory syncytial virus**

Lei Zhan<sup>a</sup>, Wen Bi Wu<sup>b</sup>, Xiao Xi Yang<sup>b</sup> and Cheng Zhi Huang<sup>\*a,b</sup>

<sup>a</sup> *Key Laboratory on Luminescence and Real-Time Analytical Chemistry (Southwest University),  
Ministry of Education, College of Chemistry and Chemical Engineering, Southwest University,  
Chongqing 400715, China*

<sup>b</sup> *College of Pharmaceutical Sciences, Southwest University, Chongqing 400716, China*

*\*Corresponding author: chengzhi@swu.edu.cn*

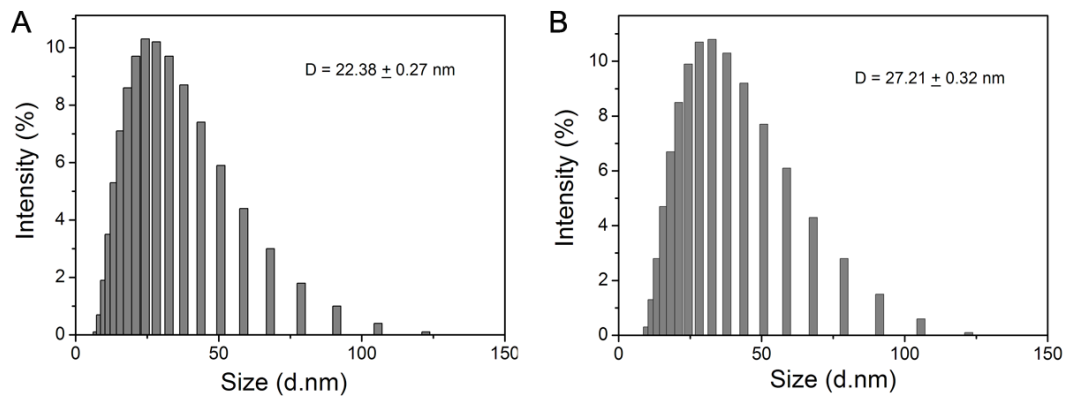

Fig. S1 Dynamic light scattering (DLS) measurements of the average hydrodynamic diameters of bare AuNPs (A) and Au-anti-RSV-HRP conjugates (B).

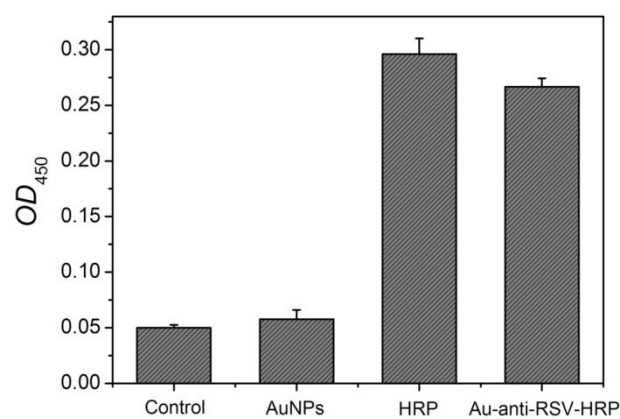

Fig. S2 Comparison of the catalytic activity of 0.95 nM bare AuNPs, 1.09  $\mu\text{g/mL}$  pure HRP and Au-anti-RSV-HRP conjugates (prepared from 0.95 nM AuNPs and 1.09  $\mu\text{g/mL}$  HRP).

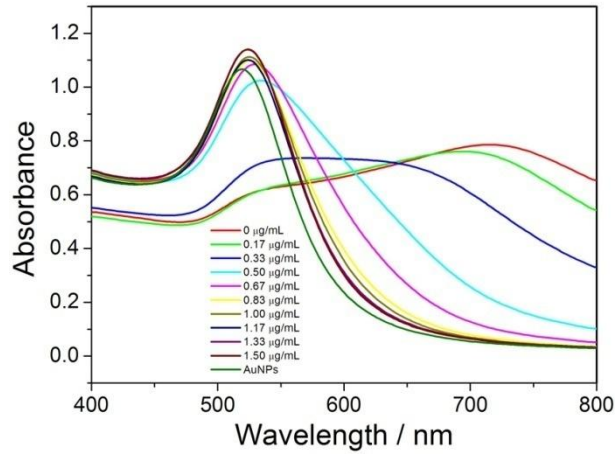

Fig. S3 AuNPs spectra recorded after the addition of increasing concentrations of anti-RSV-HRP antibody and NaCl (10%).

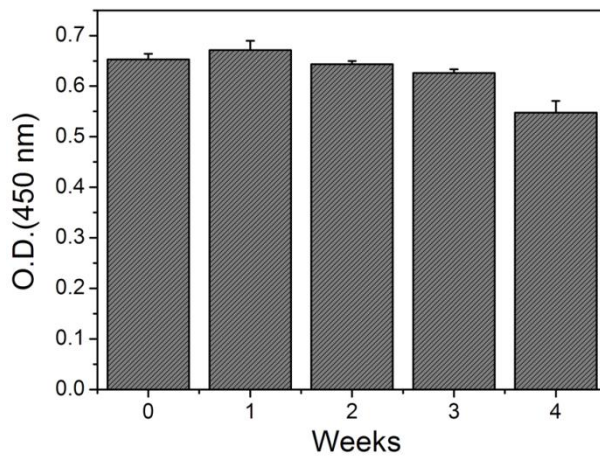

Fig. S4 Stability of the synthesized Au-anti-RSV-HRP conjugates used in the ELISA test.
